# ***Perineural Administration of Dexmedetomidine in Combination with Bupivacaine Enhances Sensory and Motor Blockade in Sciatic Nerve Block without Inducing Neurotoxicity in Rat***

Chad M. Brummett, M.D.,\* Mary A. Norat, B.S.,† John M. Palmisano, B.S.,‡ Ralph Lydic, Ph.D.§

**Background:** The current study was designed to test the hypothesis that high-dose dexmedetomidine added to local anesthetic would increase the duration of sensory and motor blockade in a rat model of sciatic nerve blockade without causing nerve damage.

**Methods:** Thirty-one adult Sprague-Dawley rats received bilateral sciatic nerve blocks with either 0.2 ml bupivacaine, 0.5%, and 0.5% bupivacaine plus 0.005% dexmedetomidine in the contralateral extremity, or 0.2 ml dexmedetomidine, 0.005%, and normal saline in the contralateral extremity. Sensory and motor function were assessed by a blinded investigator every 30 min until the return of normal sensory and motor function. Sciatic nerves were harvested at either 24 h or 14 days after injection and analyzed for perineural inflammation and nerve damage.

**Results:** High-dose dexmedetomidine added to bupivacaine significantly enhanced the duration of sensory and motor blockade. Dexmedetomidine alone did not cause significant motor or sensory block. All of the nerves analyzed had normal axons and myelin at 24 h and 14 days. Bupivacaine plus dexmedetomidine showed less perineural inflammation at 24 h than the bupivacaine group when compared with the saline control.

**Conclusion:** The finding that high-dose dexmedetomidine can safely improve the duration of bupivacaine-induced antinociception after sciatic nerve blockade in rats is an essential first step encouraging future studies in humans. The dose of dexmedetomidine used in this study may exceed the sedative safety threshold in humans and could cause prolonged motor blockade; therefore, future work with clinically relevant doses is necessary.

ALTHOUGH the use of peripheral nerve catheters has increased in recent years, the majority of anesthesiologists still perform single-injection peripheral nerve blocks. Long-acting local anesthetics alone can provide excellent analgesia for up to 9–14 h.<sup>1–4</sup> This often leaves patients feeling their first pain during the nighttime hours, however, thereby interrupting patients' sleep on the first postoperative night. The goal for anesthesiologists then becomes finding ways to prolong the duration

of single-shot regional techniques to keep patients comfortable longer.

The efficacy of clonidine, a  $\alpha_2$ -adrenoceptor agonist, in a variety of regional anesthesia techniques has been established.<sup>5</sup> Clonidine has been shown in many clinical studies to prolong the duration of anesthesia and analgesia in peripheral nerve blocks, although results with long-acting local anesthetics have been somewhat less impressive.<sup>6–15</sup> A few studies have found no beneficial effect with the addition of clonidine.<sup>16–18</sup>

*Dexmedetomidine* (Precedex<sup>®</sup>; Hospira, Inc., Lake Forest, IL) is a selective  $\alpha_2$ -adrenoceptor agonist approved by the US Food and Drug Administration for continuous intravenous sedation in the intensive care setting. A pilot study performed by our group (data not presented) showed that perineural dexmedetomidine added to 0.25% bupivacaine in rat sciatic nerve injections enhanced the duration of sensory and motor blockade. Other studies have found dexmedetomidine to be safe and effective in various neuraxial and regional anesthetics in humans, including intrathecal<sup>19</sup> and intravenous regional anesthesia.<sup>20</sup>

Studies have shown that local anesthetics cause myonecrosis; however, it is believed that the damage may not be clinically significant because the muscle normally regenerates.<sup>21–24</sup> Local anesthetics do not cause any direct nerve damage unless they are injected intraneurally or given in higher concentrations than that which is commercially available. Local anesthetic doses that are generally safe in healthy patients, however, may indeed be neurotoxic in patients with preexisting subclinical disease states, such as diabetes with subclinical neuropathy and multiple sclerosis.<sup>25–27</sup> Currently, there are no known human or animal histologic data available for dexmedetomidine injected perineurally in the periphery either by itself or in combination with a local anesthetic. This study was designed to test the hypothesis that high-dose dexmedetomidine added to a local anesthetic would improve the duration of sensory and motor blockade of sciatic nerve blocks in rats without significant nerve or tissue damage.

## **Materials and Methods**

This study adhered to American Physiologic Society and National Institutes of Health guidelines and was approved by the University of Michigan Committee for

\* Clinical Lecturer, † Laboratory Manager, ‡ Research Technician Assistant, § Professor.

Received from the Department of Anesthesiology, University of Michigan, Ann Arbor, Michigan. Submitted for publication June 20, 2007. Accepted for publication May 12, 2008. Supported by the Department of Anesthesiology, University of Michigan, Ann Arbor, Michigan. Dr. Lydic is supported by grant Nos. HL40881, HL57120, and HL65272 from the National Institutes of Health, Bethesda, Maryland. The authors have no conflict of interest. Preliminary data presented at the Association of University Anesthesiologists Annual Meeting, Chicago, Illinois, April 26–29, 2007.

Address correspondence to Dr. Brummett: Department of Anesthesiology, Division of Pain Medicine, The University of Michigan Health System, 7433 Medical Sciences Building 1, 1150 West Medical Center Drive, Ann Arbor, Michigan 48109-5615. cbrummet@umich.edu. Information on purchasing reprints may be found at [www.anesthesiology.org](http://www.anesthesiology.org) or on the masthead page at the beginning of this issue. ANESTHESIOLOGY's articles are made freely accessible to all readers, for personal use only, 6 months from the cover date of the issue.

the Use and Care of Animals (Ann Arbor, Michigan). All procedures were conducted in accordance with the *Guide for the Care and Use of Laboratory Animals*<sup>||</sup> and the *Guidelines for the Care and Use of Mammals in Neuroscience and Behavioral Research*.<sup>#</sup>

#### *Drug Preparation*

Dry bupivacaine was made up to a concentration of 1% and mixed with either normal saline or dexmedetomidine to make final concentrations of 0.5% bupivacaine and 0.5% bupivacaine plus 0.005% dexmedetomidine. In addition, 0.01% dexmedetomidine was mixed with normal saline to make 0.005% dexmedetomidine. The pH for all drugs was maintained at  $5.69 \pm 0.05$ .

#### *Subfascial Sciatic Nerve Injection*

An investigator (C.M.B.) blinded to the drug condition performed both the injections and subsequent neurobehavioral testing. Thirty-one adult male and female Sprague-Dawley rats (cesarean-derived Sprague-Dawley) weighing 250–350 g were purchased from Charles River Laboratories (Wilmington, MA). Rats without any signs of preprocedural neurobehavioral impairment were anesthetized and maintained with 1.5% isoflurane. The sciatic nerve of both hind extremities was exposed using a lateral incision over the thigh and division of the superficial fascia as previously described.<sup>28–30</sup> After the dissection, the sciatic nerve was clearly identified at a point proximal to its bifurcation. Under direct vision, all rats received bilateral injections of 0.2 ml total volume of drug per injection into the perineural space below the clear fascia covering the nerve and proximal to the bifurcation of the sciatic nerve. Sixteen rats in the bupivacaine–dexmedetomidine (Bupiv-DMET) group received either 0.5% bupivacaine (0.2 ml) or 0.5% bupivacaine plus 0.005% dexmedetomidine (0.2 ml) assigned at random, with the other drug injected on the contralateral side. Fifteen rats in the saline–dexmedetomidine (Saline-DMET) group received either 0.005% dexmedetomidine (0.2 ml) or normal saline (0.2 ml) assigned at random, with the other drug injected on the contralateral side. Injections were made using a tuberculin syringe and a 30-gauge needle. A nonabsorbable muscle fascia suture was placed at the midpoint of the injection site as a marker for subsequent nerve removal. The suture was placed in the muscle fascia of the biceps femoris below the subcutaneous tissue and was neither directly touching nor surrounding the nerve. The incisions were closed, and isoflurane was discontinued.

#### *Neurobehavioral Examination*

Sensory processing was evaluated in paw withdrawal response to forceps pinch of the lateral foot/toe. The pinch was limited to a maximum of 1 s to avoid direct paw tissue trauma. The sciatic nerve block used did not compromise the motor nerves to the hip muscles, and the rats were, therefore, able to withdraw the tested paw in response to pain.<sup>31,32</sup> Sensory responses were evaluated by the withdrawal reflex or vocalization to pinch and quantified as 0 = vigorous paw withdrawal to pinch (normal sensory function), 1 = moderate withdrawal, 2 = minimal withdrawal, or 3 = full sensory block/no response to pinch.<sup>28–30</sup> Motor function was also assessed using the 0–3 scale. Motor function was quantified as 0 = normal motor function, 1 = normal dorsiflexion ability and the rat walking with curled toes, 2 = moderate dorsiflexion ability and the rat walking with curled toes, or 3 = no dorsiflexion ability and the rat walking with curled toes.<sup>31,32</sup> Sensory and motor function were evaluated every 30 min until the complete resolution of blockade.

#### *Histopathologic Evaluation*

After the neurobehavioral examination, rats were assigned to one of two groups for sciatic nerve removal and pathologic evaluation. Nerves were removed during general anesthesia at 24 h (Bupiv-DMET group, n = 14; Saline-DMET group, n = 14) or 14 days (Bupiv-DMET group, n = 18; Saline-DMET group, n = 14). Approximately 1.5 cm of nerve was removed with the injection site at the midpoint as marked by the fascial suture in the muscle directly above. To avoid any trauma-induced artifacts, care was taken not to stretch the nerves during the removal process. Nerves were placed in 2.5% glutaraldehyde for 24–72 h and then washed three times and placed in a phosphate buffer. In the Bupiv-DMET group, 24 of the 32 nerves were sent for histopathologic evaluation (n = 12 at 24 h, n = 12 at 14 days). In the Saline-DMET group, 18 of the 28 nerves were sent for evaluation (n = 10 at 24 h, n = 8 at 14 days). Those that were not analyzed were stored at 4°C after harvesting and fixation. Nerves were cut into 5- $\mu$ m sections and stained with hematoxylin and eosin and Luxol fast blue.

A pathologist, blinded to experimental treatment, analyzed the slides using previously established scales for perineural inflammation (0 = no inflammation, 1 = small focal areas of mild edema and/or cellular infiltrate, 2 = locally extensive areas of moderate edema/cellular infiltrate, 3 = diffuse areas of moderate to marked edema/cellular infiltrate) and signs of nerve damage (0 = no lesions, 1 = 0–2% of the fibers with lesions in axons or myelin, 2 = 2–5% with lesions, 3 = more than 5% with lesions).<sup>33,34</sup>

<sup>||</sup> Guide for the Care and Use of Laboratory Animals. Washington D.C., National Academies Press, 1996. [www.nap.edu/readingroom/books/labrats](http://www.nap.edu/readingroom/books/labrats). Accessed May 5, 2008.

<sup>#</sup> Guidelines for the Care and Use of Mammals in Neuroscience and Behavioral Research. Washington, D.C., National Academies Press, 2003. [www.nationalacademies.org/ilar](http://www.nationalacademies.org/ilar). Accessed May 5, 2008.

**Table 1. Sensory Scores for Bupivacaine and Bupivacaine plus Dexmedetomidine**

| Time, min | Bupivacaine |        |          |          | Bupivacaine + Dexmedetomidine |        |          |          | P Value |
|-----------|-------------|--------|----------|----------|-------------------------------|--------|----------|----------|---------|
|           | Mean ± SEM  | Median | 25th IQR | 75th IQR | Mean ± SEM                    | Median | 25th IQR | 75th IQR |         |
| 30        | 2.94 ± 0.06 | 3      | 3        | 3        | 2.63 ± 0.20                   | 3      | 2        | 3        | NS      |
| 60        | 2.88 ± 0.13 | 3      | 3        | 3        | 2.88 ± 0.09                   | 3      | 3        | 3        | NS      |
| 90        | 2.19 ± 0.31 | 3      | 1        | 3        | 2.88 ± 0.09                   | 3      | 3        | 3        | NS      |
| 120       | 2.00 ± 0.32 | 3      | 1        | 3        | 2.88 ± 0.09                   | 3      | 3        | 3        | 0.016   |
| 150       | 1.44 ± 0.35 | 1.5    | 0        | 3        | 2.56 ± 0.20                   | 3      | 2        | 3        | 0.006   |
| 180       | 1.38 ± 0.34 | 1.5    | 0        | 3        | 2.00 ± 0.33                   | 3      | 0        | 3        | NS      |
| 210       | 1.13 ± 0.30 | 1      | 0        | 2        | 1.75 ± 0.34                   | 2      | 0        | 3        | NS      |
| 240       | 0.75 ± 0.28 | 0      | 0        | 2        | 1.50 ± 0.33                   | 2      | 0        | 3        | 0.012   |
| 270       | 0.44 ± 0.20 | 0      | 0        | 1        | 1.13 ± 0.30                   | 1      | 0        | 2        | 0.005   |
| 300       | 0.19 ± 0.10 | 0      | 0        | 0        | 0.63 ± 0.22                   | 0      | 0        | 2        | 0.047   |
| 330       | 0           | 0      | 0        | 0        | 0.19 ± 0.14                   | 0      | 0        | 0        | NA      |
| 360       | 0           | 0      | 0        | 0        | 0.06 ± 0.06                   | 0      | 0        | 0        | NA      |
| 390       | 0           | 0      | 0        | 0        | 0                             | 0      | 0        | 0        | NA      |

Sensory scores (complete blockade sensory score = 3, normal sensory function = 0) were significantly improved at multiple time points when the bupivacaine plus dexmedetomidine group was compared with the bupivacaine group. Time course data for sensory testing was analyzed using a nonparametric model with ordinal logistic regression for repeated measures and generalized estimating equations.

IQR = interquartile range; NA = not applicable; NS = not significant ( $P < 0.05$  deemed significant).

### Statistics

Sensory and motor time-course data were analyzed using SAS 9.1.3 (SAS Institute Inc., Cary, NC) and a nonparametric model with ordinal logistic regression for repeated measures and generalized estimating equations. The duration of complete sensory and motor blockade and the time to recovery of normal sensory and motor function were analyzed using GBStat version 6.5.6 (Dynamic Microsystems, Inc., Silver Spring, MD). For the analysis of complete blockade and time to recovery of normal function, analyses were completed using repeated-measures analysis of variance followed by the Tukey-Kramer multiple comparisons test. Before performing the repeated-measures analysis of variance, Kolmogorov-Smirnov and Shapiro-Wilk W tests were used to ensure normal distribution of data. The dependent measure for these analyses was time in minutes. Histopathology scores were also analyzed using GB-STAT version 6.5.6 (Dynamic Microsystems, Inc.) and were treated as nonparametric data. Analysis was completed using Wilcoxon

rank sum/Mann-Whitney U test comparing all groups with the saline control.

## Results

### Neurobehavioral Results

Dexmedetomidine added to bupivacaine enhanced sensory blockade when compared with bupivacaine alone at time points 120, 150, 240, 270, and 300 min (table 1 and fig. 1). Dexmedetomidine added to bupivacaine also enhanced motor blockade when compared with bupivacaine alone at time points 90, 150, 180, 210, 240, 270, and 300 min (table 2 and fig. 2). Bupivacaine and bupivacaine plus dexmedetomidine enhanced sensory blockade when compared individually with saline and dexmedetomidine at time points 30 ( $P < 0.0001$ ), 60 ( $P < 0.0001$ ), and 90 ( $P < 0.0001$ ) min (fig. 1). Bupivacaine plus dexmedetomidine showed significantly prolonged motor scores at time points 30 ( $P = 0.009$ ), 60 ( $P < 0.0001$ ), and 90 ( $P < 0.0001$ ) min when

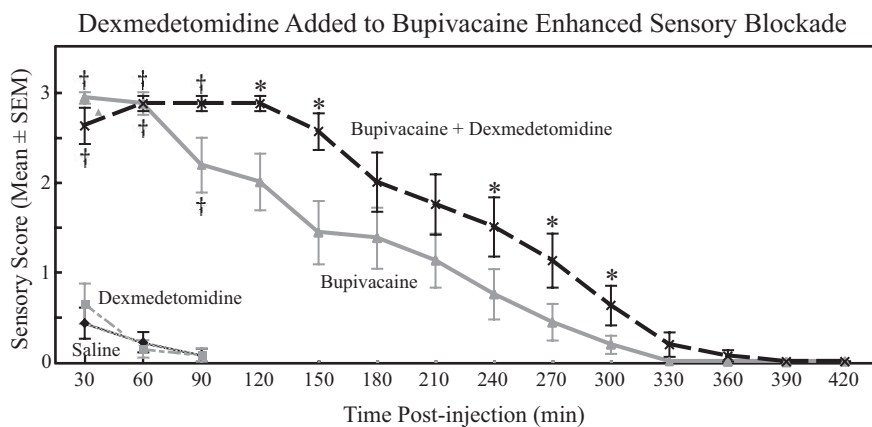

**Fig. 1. Sensory blockade: Dexmedetomidine added to bupivacaine enhanced the duration of sensory blockade in response to lateral paw pinch when compared with bupivacaine alone. Bupivacaine and bupivacaine plus dexmedetomidine showed improved sensory scores when compared with saline and dexmedetomidine. The time course demonstrates the progression from complete sensory blockade (score = 3) to recovery of normal sensory function (score = 0). Time course data for sensory testing were analyzed using a nonparametric model with ordinal logistic regression for repeated measures and generalized estimating equations. \* Significant differences for bupivacaine plus dexmedetomidine versus bupivacaine alone at specific times after injection. † Significant differences between dexmedetomidine and saline when compared with bupivacaine plus dexmedetomidine and bupivacaine.**



**Table 2. Motor Scores for Bupivacaine and Bupivacaine plus Dexmedetomidine**

| Time, min | Bupivacaine     |        |          |          | Bupivacaine + Dexmedetomidine |        |          |          | P Value |
|-----------|-----------------|--------|----------|----------|-------------------------------|--------|----------|----------|---------|
|           | Mean $\pm$ SEM  | Median | 25th IQR | 75th IQR | Mean $\pm$ SEM                | Median | 25th IQR | 75th IQR |         |
| 30        | 2.69 $\pm$ 0.12 | 3      | 2        | 3        | 2.94 $\pm$ 0.06               | 3      | 3        | 3        | NS      |
| 60        | 2.63 $\pm$ 0.15 | 3      | 2        | 3        | 2.94 $\pm$ 0.06               | 3      | 3        | 3        | NS      |
| 90        | 2.31 $\pm$ 0.28 | 3      | 1        | 3        | 2.94 $\pm$ 0.06               | 3      | 3        | 3        | 0.042   |
| 120       | 2.06 $\pm$ 0.32 | 3      | 0        | 3        | 2.75 $\pm$ 0.11               | 3      | 2        | 3        | NS      |
| 150       | 1.56 $\pm$ 0.32 | 2      | 0        | 3        | 2.56 $\pm$ 0.16               | 3      | 2        | 3        | 0.002   |
| 180       | 1.31 $\pm$ 0.30 | 1.5    | 0        | 2        | 2.19 $\pm$ 0.19               | 2      | 2        | 3        | 0.01    |
| 210       | 0.94 $\pm$ 0.28 | 0.5    | 0        | 2        | 1.75 $\pm$ 0.27               | 2      | 1        | 3        | 0.01    |
| 240       | 0.81 $\pm$ 0.28 | 0      | 0        | 2        | 1.31 $\pm$ 0.27               | 1      | 0        | 2        | 0.029   |
| 270       | 0.56 $\pm$ 0.24 | 0      | 0        | 1        | 1.00 $\pm$ 0.26               | 1      | 0        | 2        | 0.042   |
| 300       | 0.25 $\pm$ 0.11 | 0      | 0        | 0        | 0.63 $\pm$ 0.20               | 0      | 0        | 1        | 0.038   |
| 330       | 0               | 0      | 0        | 0        | 0.13 $\pm$ 0.09               | 0      | 0        | 0        | NA      |
| 360       | 0               | 0      | 0        | 0        | 0.13 $\pm$ 0.09               | 0      | 0        | 0        | NA      |
| 390       | 0               | 0      | 0        | 0        | 0.06 $\pm$ 0.06               | 0      | 0        | 0        | NA      |
| 420       | 0               | 0      | 0        | 0        | 0                             | 0      | 0        | 0        | NA      |

Motor scores (complete blockade motor score = 3, normal motor function = 0) were significantly improved at multiple time points when the bupivacaine plus dexmedetomidine group was compared with the bupivacaine group. Time course data for motor testing was analyzed using a nonparametric model with ordinal logistic regression for repeated measures and generalized estimating equations.

IQR = interquartile range; NA = not applicable; NS = not significant ( $P < 0.05$  deemed significant).

compared with saline and dexmedetomidine (fig. 2). Bupivacaine showed significantly lengthened motor scores at time points 60 ( $P < 0.0001$ ) and 90 ( $P = 0.0002$ ) min when compared with saline and dexmedetomidine (fig. 2).

The duration of complete sensory blockade (sensory score = 3) was significantly increased when bupivacaine plus dexmedetomidine was compared with bupivacaine. None of the rats in the Saline-DMET group ever had a complete sensory block. In addition, the time to recovery of normal sensory function (sensory score = 0) was increased when bupivacaine plus dexmedetomidine was compared with bupivacaine, dexmedetomidine, and saline (fig. 3).

The duration of complete motor blockade (motor score = 3) was significantly lengthened when bupivacaine plus dexmedetomidine and bupivacaine were individually compared with dexmedetomidine and saline. The trend toward prolonged complete motor blockade

when bupivacaine plus dexmedetomidine was compared with bupivacaine was not significant. The time to complete recovery of normal motor function (motor score = 0) was significantly longer when bupivacaine plus dexmedetomidine was compared with bupivacaine, dexmedetomidine, and saline. The increased time to motor recovery was also significant when bupivacaine was compared with dexmedetomidine and saline (fig. 4).

In the Saline-DMET group, one rat was eliminated because of direct nerve damage during the dissection and was subsequently excluded and killed. All other animals underwent full neurobehavioral monitoring and subsequent nerve removal as described above in the Neurobehavioral Examination section of the Materials and Methods.

#### Histopathology

Sciatic nerve histopathology at 24 h and 14 days showed normal axons and myelin in all nerves analyzed

**Fig. 2. Motor blockade: Dexmedetomidine added to bupivacaine also extended the duration of motor blockade over time when compared with bupivacaine alone. Bupivacaine and bupivacaine plus dexmedetomidine showed improved motor scores when compared with saline and dexmedetomidine. The time course again shows the progression from complete motor blockade (score = 3) to the return of normal motor function (score = 0). Time course data for motor testing were analyzed using a nonparametric model with ordinal logistic regression for repeated measures and generalized estimating equations. \* Significant differences for bupivacaine plus dexmedetomidine versus bupivacaine alone at specific times postinjection. † Significant differences between dexmedetomidine and saline when compared with bupivacaine plus dexmedetomidine and bupivacaine.**

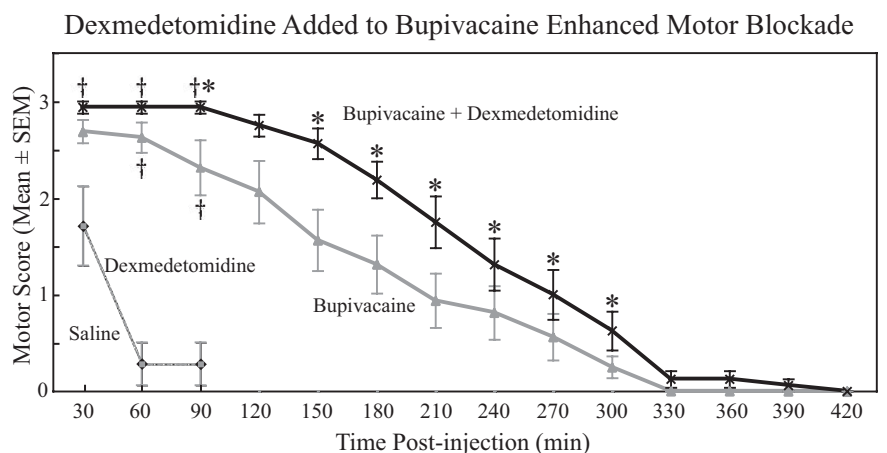

## Dexmedetomidine Added to Bupivacaine Increased the Duration of Sensory Blockade and Time to Sensory Recovery

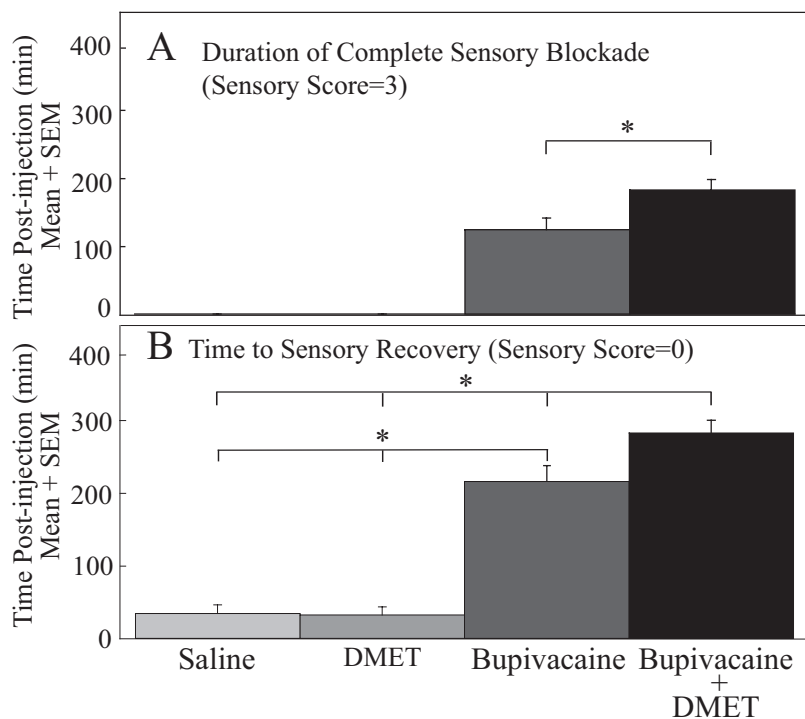

**Fig. 3.** The duration of complete sensory blockade (A) was significantly increased when bupivacaine plus dexmedetomidine (DMET) ( $182.0 \pm 15.6$  min) was compared with bupivacaine ( $123.8 \pm 17.3$  min;  $P < 0.01$ ). None of the rats in the saline or dexmedetomidine groups had a complete sensory blockade. In addition, the time to recovery of normal sensory function (B) was increased when bupivacaine plus dexmedetomidine ( $282.0 \pm 17.8$  min) was compared with bupivacaine ( $215.6 \pm 21.6$  min;  $P < 0.05$ ), dexmedetomidine ( $32.1 \pm 11.1$  min;  $P < 0.01$ ), and saline ( $34.3 \pm 11.7$  min;  $P < 0.01$ ). \* Significant differences. Analyses were completed using repeated-measures analysis of variance followed by Tukey-Kramer multiple comparisons test. The dependent measure for these analyses was time in minutes.

(histopathology score = 0). Figure 5 shows representative sciatic nerve histopathology. When compared with the saline control group, the bupivacaine group had significantly higher perineural inflammation scores at 24 h. Nerves in the bupivacaine plus dexmedetomidine group showed less perineural inflammation at 24 h when compared with the bupivacaine group (table 3). There were no differences in perineural inflammation between the saline control, dexmedetomidine, and bupivacaine plus dexmedetomidine groups at 24 h (table 3). None of the nerves analyzed at 14 days showed significant perineural inflammation.

## Discussion

### *Dexmedetomidine Enhancement of Sensory and Motor Blockade*

In this placebo-controlled, randomized, blinded study, high-dose dexmedetomidine added to bupivacaine significantly enhanced sensory and motor blockade in sciatic nerve blocks in rats (figs. 1–4 and tables 1 and 2). The effect of dexmedetomidine was only significant when added to bupivacaine, thereby refuting the central analgesic effects of dexmedetomidine as the reason for increased duration of sensory blockade.

Dexmedetomidine alone did not produce significant sensory blockade or sustained motor blockade, which is consistent with that which has been seen with clonidine in both laboratory and clinical work. In rabbit sciatic

nerves, supraclinical doses of clonidine were found to inhibit C-fiber action potentials; however, doses almost 1,000-fold lower prolonged the duration of lidocaine blocks.<sup>35</sup> In humans, clonidine did not provide adequate analgesia when used as the sole anesthetic in brachial plexus blockade.<sup>36</sup> These data along with the laboratory and clinical clonidine data suggest a possible class effect for  $\alpha_2$ -adrenoceptor agonists in peripheral nerve blocks.

There have been four proposed mechanisms for the action of clonidine in peripheral nerve blocks. These mechanisms include centrally mediated analgesia,  $\alpha_{2B}$ -adrenoceptor-mediated vasoconstrictive effects, attenuation of the inflammatory response, and direct action on the peripheral nerve.

Central analgesia, vasoconstriction, and antiinflammatory properties do not fully explain the efficacy of clonidine in peripheral nerve blocks. The duration of anesthesia and analgesia was prolonged with perineural clonidine compared with subcutaneous<sup>14</sup> and intramuscular controls.<sup>9,37</sup> Despite higher plasma levels of clonidine with intramuscular administration, perineural administration provided better analgesia, thereby refuting a central mechanism.<sup>9</sup> Although  $\alpha_{2B}$  adrenoceptors do mediate vasoconstriction in the periphery, the vasoconstrictive properties of clonidine are weaker than those of epinephrine.<sup>18</sup> Unlike epinephrine, the enhancement of sensory blockade with clonidine is not attenuated by the coadministration of  $\alpha$ -adrenoceptor antagonists.<sup>38,39</sup> Recent work by Eisenach *et al.* has

Dexmedetomidine Added to Bupivacaine Increased the Duration of Motor Blockade and Time to Motor Recovery

**Fig. 4.** The duration of complete motor blockade (A) was significantly improved when bupivacaine plus dexmedetomidine (DMET) (158.0 ± 19.1 min) and bupivacaine (101.3 ± 20.7 min) were individually compared with dexmedetomidine (21.4 ± 6.6 min; *P* < 0.01) and saline (21.4 ± 6.6 min; *P* < 0.01). The trend toward prolonged complete motor blockade when bupivacaine plus dexmedetomidine was compared with bupivacaine was not significant. The time to complete recovery of normal motor function (B) was significantly longer when bupivacaine plus dexmedetomidine (306.0 ± 14.4 min) was compared with bupivacaine (223.1 ± 22.4 min; *P* < 0.01), dexmedetomidine (42.9 ± 11.6 min; *P* < 0.01), and saline (42.9 ± 11.6 min; *P* < 0.01). The increased time to motor recovery was also significant when bupivacaine alone was compared with dexmedetomidine (*P* < 0.01) and saline (*P* < 0.01). \* Significant differences. Analyses were completed using repeated-measures analysis of variance followed by Tukey-Kramer multiple comparisons test. The dependent measure for these analyses was time in minutes.

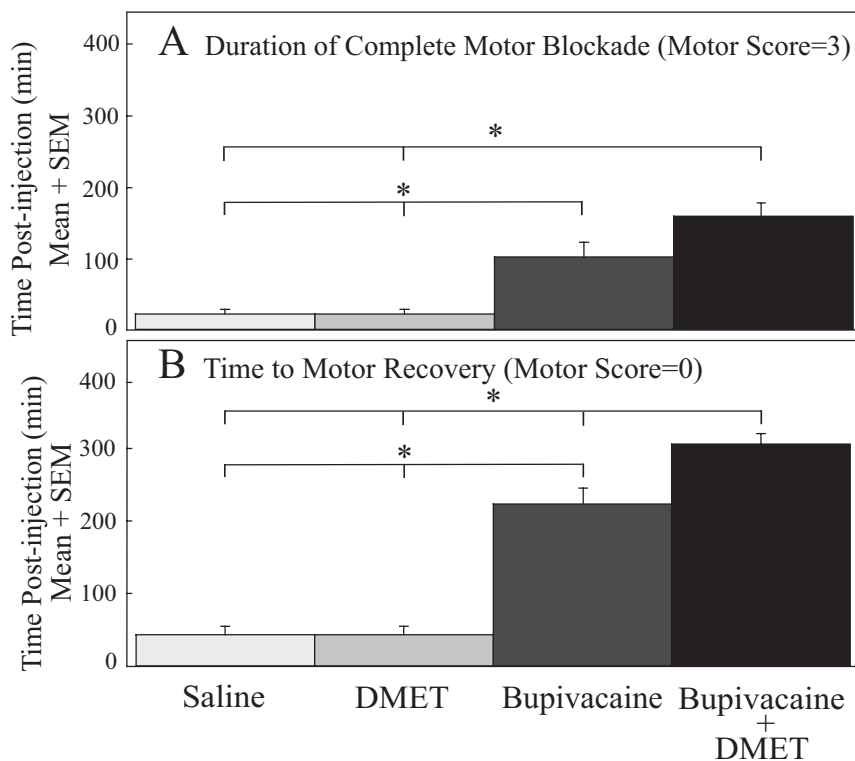

shown that  $\alpha_2$ -adrenoceptor agonists attenuate the inflammatory response in a nerve injury model in rats.<sup>40-45</sup> Although these findings are extremely important in the study of neuropathic pain, they do not explain the im-

mediate antinociceptive benefits of perineural clonidine added to local anesthetic in an acute pain model.

Laboratory work dating back as early as 1972 indicates that clonidine has a direct effect on the peripheral nerve

Perineural Inflammation Score

**Fig. 5.** Nerves were sectioned and stained with hematoxylin and eosin to assess perineural inflammation at 24 h and 14 days. Nerves in the bupivacaine group had higher inflammation scores at 24 h when compared with the saline control. Bupivacaine plus dexmedetomidine and dexmedetomidine alone had similar inflammation scores compared with normal saline at 24 h. At 14 days, nerves in both groups were completely normal with inflammation scores of 0. (A) Inflammation score = 0: The perineural space is void of any significant inflammatory cells. (B) Inflammation score = 1: Focal portions of perineural inflammation involving 5-10% of the sections. (C) Inflammation score = 2: Moderate degree of perineural inflammation. (D) Inflammation score = 3: Severe inflammation is seen with large numbers of lymphocytes surrounding the nerve.

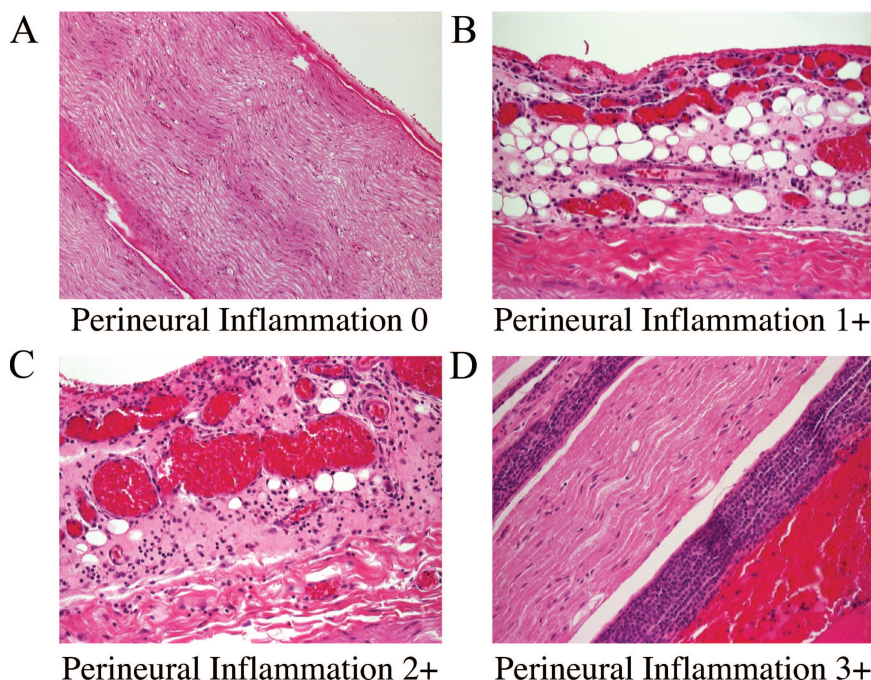



**Table 3. Histopathologic Perineural Inflammation Scores at 24 Hours**

| Drug                          | Perineural Inflammation Score |          |          | Comparison with Saline,<br><i>P</i> Value | Bupivacaine vs.<br>Bupivacaine + Dexmedetomidine,<br><i>P</i> Value |
|-------------------------------|-------------------------------|----------|----------|-------------------------------------------|---------------------------------------------------------------------|
|                               | Median                        | 25th IQR | 75th IQR |                                           |                                                                     |
| Saline                        | 2                             | 1        | 2        | NA                                        | NA                                                                  |
| Dexmedetomidine               | 1                             | 0.5      | 2.5      | NS                                        | NA                                                                  |
| Bupivacaine                   | 3                             | 2        | 3        | < 0.04*                                   | < 0.04†                                                             |
| Bupivacaine + dexmedetomidine | 1                             | 1        | 2        | NS                                        | NA                                                                  |

Dexmedetomidine attenuated the acute bupivacaine-induced perineural inflammation. When compared with the saline control group, bupivacaine showed higher inflammation scores at 24 h. The increased perineural inflammation at 24 h when bupivacaine was compared with bupivacaine plus dexmedetomidine was also statistically significant. There were no differences between the saline control, dexmedetomidine, and bupivacaine plus dexmedetomidine groups. Perineural inflammation scores were assessed by a blinded pathologist as follows: 0 = no inflammation, 1 = small focal areas of mild edema and/or cellular infiltrate, 2 = locally extensive areas of moderate edema/cellular infiltrate, 3 = diffuse areas of moderate to marked edema/cellular infiltrate.

\* Statistical significance determined based on comparison with saline placebo group (Wilcoxon rank sum/Mann-Whitney U test). † Statistical significance when bupivacaine was compared with bupivacaine plus dexmedetomidine (Wilcoxon rank sum/Mann-Whitney U test).

IQR = interquartile range; NA = not applicable; NS = not significant ( $P < 0.05$  deemed significant).

that is not mediated *via* the  $\alpha_2$  adrenoceptor.<sup>46</sup> Clonidine produced a concentration-dependent, reversible blockade of compound action potentials in frog sciatic nerves,<sup>46</sup> rat sciatic nerves,<sup>47</sup> and desheathed rabbit vagus nerves.<sup>35,48</sup> The effects were found to be greater on C fibers than A $\alpha$  fibers.<sup>47</sup> These local anesthetic effects at high concentrations, however, do not explain the apparent additive or synergistic effects of clonidine added to local anesthetics in peripheral nerve blocks in humans. In 1994, Gaumann *et al.*<sup>48</sup> exhibited clonidine's ability to increase the hyperpolarizing afterpotential that follows a single compound action potential. Kroin *et al.*<sup>38</sup> later found that lidocaine added to ZD 7288, a specific blocker of the  $I_h$  current, extended sensory blockade to pinprick in rat sciatic nerve blocks equivalent to the prolongation seen with the lidocaine and clonidine mixture. Dalle *et al.*<sup>49</sup> later corroborated this finding in a sucrose-gap method on the C fibers of rabbit vagus nerves. The authors concluded that clonidine enhances activity-dependent hyperpolarization by inhibiting the  $I_h$  current. The  $I_h$  current plays a key role in cell excitability, especially the firing frequency, in both the central and peripheral nervous systems.<sup>50</sup> The  $I_h$  current is activated during the hyperpolarization phase of an action potential and normally acts to reset a nerve for subsequent action potentials. Therefore, by blocking the  $I_h$  current, clonidine enhances hyperpolarization and inhibits subsequent action potentials.

There are some recent studies investigating the mechanism of action of dexmedetomidine in the central nervous system. Dexmedetomidine was found to inhibit rat hypothalamic paraventricular nucleus neurons by activation of the G protein-coupled inwardly rectifying  $K^+$  current and paraventricular nucleus parvocellular neurons by suppression of  $I_h$ .<sup>51</sup> An *in vitro* study of rat dorsal root ganglion neurons found that when combined with lidocaine, both clonidine and dexmedetomidine produced an additive blockade-type interaction on tetrodotoxin-resistant sodium current.<sup>52</sup> Although these stud-

ies investigated central mechanisms of action for dexmedetomidine, when combined with the aforementioned clonidine literature, hypotheses as to possible mechanisms of action for dexmedetomidine in peripheral nerves can be drawn.

The current study does not elucidate the mechanism by which dexmedetomidine enhances local anesthetics in peripheral nerve blocks. It is, however, the first study to report the peripheral perineural administration of dexmedetomidine. Given that dexmedetomidine and clonidine are both selective  $\alpha_2$ -adrenoceptor agonists, it is possible that they work in a similar manner and may indicate a class effect. The peripheral mechanism of clonidine, however, does not seem to be  $\alpha_2$  mediated.

#### *Histopathologic Evaluation of Perineural Dexmedetomidine*

To our knowledge, this is also the first reported histopathologic evaluation of peripheral perineural administration of dexmedetomidine. Clonidine has long been used in clinical practice for oral, intravenous, subcutaneous, perineural, epidural, and intravenous administration without ill effect. In addition, previous studies of intrathecal administration of high doses of clonidine in rats<sup>53</sup> and dogs<sup>54</sup> did not find any toxicity to the spinal cord or nerve roots. A study published while the current results were being reviewed found demyelination of the oligodendrocytes in the white matter of the spinal cord when dexmedetomidine 5 or 10  $\mu\text{g}$  was injected into the epidural space in rabbits.<sup>55</sup> The rabbits in the higher-dose epidural dexmedetomidine group received between 6.06 and 6.25  $\mu\text{g}/\text{kg}$ , and the spinal cords were removed for histopathologic analysis 60 min after drug injection and only 1 day after the placement of the epidural catheter. A saline group was not included, and the injectate pH was neither adjusted nor reported. The neurotoxic effects of epidural dexmedetomidine reported could be due to a species effect, pH, vasoconstriction of the spinal cord vascular supply, or direct trauma from epidural placement.

In the current study, all of the nerves analyzed for histopathologic changes were normal at 24 h and 14 days. The concentration of dexmedetomidine was based on our proposed human clinical dosing of 2  $\mu\text{g}/\text{kg}$  for peripheral nerve blocks. This concentration was derived from previous human epidural and intravenous regional anesthesia studies. Estimating the average patient to be 75 kg, the concentration for a 30-ml brachial plexus block would be 5  $\mu\text{g}/\text{ml}$ . Therefore, the current study used a concentration of 50  $\mu\text{g}/\text{ml}$  for a total dosing between 28 and 40  $\mu\text{g}/\text{kg}$  to demonstrate a wider safety margin for both concentration and total dosing. Although there are significant differences between epidural and peripheral perineural administration, it is surprising that the 28–40  $\mu\text{g}/\text{kg}$  used in the current study did not affect the axons or myelin of the sciatic nerve, whereas the 6.25  $\mu\text{g}/\text{kg}$  in the epidural rabbit model led to significant myelin damage.<sup>55</sup> Future studies in other animal species may help to clarify this discrepancy.

Consistent with the previously noted decrease in inflammatory mediators after perineural clonidine administration,<sup>40–45</sup> the current study found a significant reduction in perineural inflammation at 24 h when dexmedetomidine was added to bupivacaine as compared with bupivacaine alone. Bupivacaine alone had higher perineural inflammation scores at 24 h compared with the saline control group (table 3). Both the bupivacaine plus dexmedetomidine and dexmedetomidine alone groups showed perineural inflammation scores similar to the saline control group. As previously discussed, the decrease in perineural inflammation is believed to be due to a decrease in proinflammatory products from immune cells recruited to the site of injury and an increase in antiinflammatory cytokines.<sup>40–45</sup>

Local anesthetics are known to be myotoxic<sup>21–24</sup>; however, the clinical significance of local anesthetic-induced myotoxicity is still somewhat unclear because there are few reported cases of significant muscle pathology in the literature. This study did not investigate the myotoxic effects of local anesthetics combined with dexmedetomidine and may be an area of future research. Although the reports of clinically significant myotoxicity are limited to date,<sup>23</sup> as regional anesthesia grows, the number of reported cases would be expected to increase. In addition, the increased use of peripheral nerve catheters<sup>56–58</sup> and infusion over several days may make this issue more significant. As previously noted, some patients may be at a higher risk of postprocedural neurologic dysfunction due to comorbidities, such as diabetes or multiple sclerosis.<sup>25–27</sup> In these patients, the proinflammatory, neurotoxic effects of local anesthetics may be contraindicated. The ability of  $\alpha_2$ -adrenoceptor agonists to attenuate the inflammatory response<sup>40–45,56</sup> may improve safety in peripheral nerve catheters and single-shot blocks.

### Limitations

As noted above, the concentration of dexmedetomidine used far exceeds that which we propose as a potentially appropriate human dose, and the effects of more clinically relevant doses in this species are still unknown. In addition, it is unknown whether human responses to clinically relevant doses would be significant.

Clonidine is known to produce a dose-dependent inhibition of A $\alpha$  and C fibers, with C fibers having been shown to be more profoundly affected.<sup>35,47,48</sup> C fibers are known to mediate dull pain and burning sensations; however, the model used for neurobehavioral monitoring in the current study was equivalent to a surgical stimulus. Although dexmedetomidine added to bupivacaine was shown to enhance both sensory and motor blockade, using a model to elicit dull pain may have shown more subtle sensory differences. This difference may better correlate with the postoperative sensory changes previously seen in human perineural clonidine studies.<sup>6–15</sup>

In addition, rats received high doses of dexmedetomidine, which is known to cause sedation. Whereas high doses, between 28 and 40  $\mu\text{g}/\text{kg}$ , were necessary to prove a satisfactory safety margin, the neurobehavioral monitoring was likely altered. Systemic dexmedetomidine is known to provide analgesia and sedation, which might also affect sensory and motor testing. Each rat received bilateral sciatic nerve blocks, however, and thereby acted as its own control. Furthermore, a blinded investigator conducted the neurobehavioral testing. Rats in the Saline-DMET group never had a complete sensory block, nor was their motor block as sustained as that which was seen in the Bupiv-DMET group. Although rats in the Saline-DMET group did have short durations of complete motor blockade, this was likely a product of centrally mediated sedation. However, the motor blockade seen in the Saline-DMET group was far less consistent than that in the Bupiv-DMET group and tended to remit quickly. Using a model in which separate rats received unilateral, single blocks with local anesthetic plus dexmedetomidine *versus* local anesthetic alone may be interesting. It would, however, be very difficult to blind because of the sedative effects of high-dose dexmedetomidine. Future dose ranging studies will help to determine whether clinically relevant doses may have the same effect.

### Conclusions

This study supports the hypothesis that large-dose dexmedetomidine enhances the duration of bupivacaine anesthesia and analgesia of sciatic nerve block in rat. The results are consistent with laboratory clonidine data. The histopathologic evaluation showed that nerve axon and



myelin were normal in both groups at 24 h and 14 days. To our knowledge, this is the first study to evaluate nerve histopathologic changes of a high-dose  $\alpha_2$ -adrenoceptor agonist in peripheral nerve block in rats. Under the conditions of the study, high-dose dexmedetomidine attenuates the acute bupivacaine-induced perineural inflammation without causing nerve damage. The finding that dexmedetomidine can safely improve the duration of bupivacaine-induced antinociception after sciatic nerve blockade in rats is an essential first step encouraging future studies in patients.

The authors thank Kevin K. Tremper, M.D., Ph.D. (Professor, Department of Anesthesiology, University of Michigan, Ann Arbor, Michigan), Peter Gerner, M.D. (Assistant Professor, Department of Anesthesiology, Perioperative and Pain Medicine, Brigham and Women's Hospital, Harvard Medical School, Boston, Massachusetts), and Robert Hurley, M.D., Ph.D. (Assistant Professor, Pain Management Division, Department of Anesthesiology and Critical Care Medicine, Johns Hopkins School of Medicine, Baltimore, Maryland). For statistical support, the authors thank Kathy Welch, M.A., M.P.H. (Adjunct Lecturer, Biostatistics, and Statistician Staff Specialist, Center for Statistical Consultation and Research, University of Michigan). For technical support, the authors thank Diane Ignasiak, B.S. (Assistant Laboratory Manager), Christopher Watson, Ph.D. (Postdoctoral Fellow), Sarah Watson, B.S. (Research Associate), and Deborah Wagner, Pharm.D. (Associate Professor of Pharmacy, College of Pharmacy, Clinical Pharmacist, University of Michigan Hospital Pharmacy Services, and Assistant Professor of Anesthesiology, University of Michigan School of Medicine).

## References

- Casati A, Fanelli G, Albertin A, Deni F, Anelati D, Antonino FA, Beccaria P: Interscalene brachial plexus anesthesia with either 0.5% ropivacaine or 0.5% bupivacaine. *Minerva Anestesiol* 2000; 66:39-44
- Hickey R, Hoffman J, Ramamurthy S: A comparison of ropivacaine 0.5% and bupivacaine 0.5% for brachial plexus block. *ANESTHESIOLOGY* 1991; 74:639-42
- Hickey R, Rowley CL, Candido KD, Hoffman J, Ramamurthy S, Winnie AP: A comparative study of 0.25% ropivacaine and 0.25% bupivacaine for brachial plexus block. *Anesth Analg* 1992; 75:602-6
- Vaghadia H, Chan V, Ganapathy S, Lui A, McKenna J, Zimmer K: A multicentre trial of ropivacaine 7.5 mg x ml(-1) versus bupivacaine 5 mg x ml(-1) for supra clavicular brachial plexus anesthesia. *Can J Anaesth* 1999; 46:946-51
- Eisenach JC, De Kock M, Klimscha W: Alpha(2)-adrenergic agonists for regional anesthesia: A clinical review of clonidine (1984-1995). *ANESTHESIOLOGY* 1996; 85:655-74
- Casati A, Magistris L, Fanelli G, Beccaria P, Cappelleri G, Aldegheri G, Torri G: Small-dose clonidine prolongs postoperative analgesia after sciatic-femoral nerve block with 0.75% ropivacaine for foot surgery. *Anesth Analg* 2000; 91:388-92
- El Saied AH, Steyn MP, Ansermino JM: Clonidine prolongs the effect of ropivacaine for axillary brachial plexus blockade. *Can J Anaesth* 2000; 47:962-7
- Eledjam JJ, Deschodt J, Viel EJ, Lubrano JF, Charavel P, d'Athis F, du Cailar J: Brachial plexus block with bupivacaine: Effects of added alpha-adrenergic agonists: Comparison between clonidine and epinephrine. *Can J Anaesth* 1991; 38:870-5
- Hutschala D, Mascher H, Schmetterer L, Klimscha W, Fleck T, Eichler HG, Tschernko EM: Clonidine added to bupivacaine enhances and prolongs analgesia after brachial plexus block *via* a local mechanism in healthy volunteers. *Eur J Anaesthesiol* 2004; 21:198-204
- Iohom G, Machmachi A, Diarra DP, Khatouf M, Boileau S, Dap F, Boini S, Mertes PM, Bouaziz H: The effects of clonidine added to mepivacaine for paronychia surgery under axillary brachial plexus block. *Anesth Analg* 2005; 100:1179-83
- Iskandar H, Benard A, Ruel-Raymond J, Cochard G, Manaud B: The analgesic effect of interscalene block using clonidine as an analgesic for shoulder arthroscopy. *Anesth Analg* 2003; 96:260-2
- Iskandar H, Guillaume E, Dixmieras F, Binje B, Rakotondriamihy S, Thiebaut R, Maurette P: The enhancement of sensory blockade by clonidine selectively added to mepivacaine after midhumeral block. *Anesth Analg* 2001; 93:771-5
- Reinhart DJ, Wang W, Stagg KS, Walker KG, Bailey PL, Walker EB, Zaugg SE: Postoperative analgesia after peripheral nerve block for podiatric surgery: Clinical efficacy and chemical stability of lidocaine alone versus lidocaine plus clonidine. *Anesth Analg* 1996; 83:760-5
- Singelyn FJ, Dangoisse M, Bartholomee S, Gouverneur JM: Adding clonidine to mepivacaine prolongs the duration of anesthesia and analgesia after axillary brachial plexus block. *Reg Anesth* 1992; 17:148-50
- Singelyn FJ, Gouverneur JM, Robert A: A minimum dose of clonidine added to mepivacaine prolongs the duration of anesthesia and analgesia after axillary brachial plexus block. *Anesth Analg* 1996; 83:1046-50
- Culebras X, Van Gessel E, Hoffmeyer P, Gamulin Z: Clonidine combined with a long acting local anesthetic does not prolong postoperative analgesia after brachial plexus block but does induce hemodynamic changes. *Anesth Analg* 2001; 92:199-204
- Duma A, Urbaneck B, Sitzwohl C, Kreiger A, Zimpfer M, Kapral S: Clonidine as an adjuvant to local anaesthetic axillary brachial plexus block: A randomized, controlled study. *Br J Anaesth* 2005; 94:112-6
- Gaumann D, Forster A, Griessen M, Habre W, Poinot O, Della Santa D: Comparison between clonidine and epinephrine admixture to lidocaine in brachial plexus block. *Anesth Analg* 1992; 75:69-74
- Kanazi GE, Aouad MT, Jabbour-Khoury SI, Al Jazzar MD, Alameddine MM, Al-Yaman R, Bulbul M, Baraka AS: Effect of low-dose dexmedetomidine or clonidine on the characteristics of bupivacaine spinal block. *Acta Anaesthesiol Scand* 2006; 50:222-7
- Memis D, Turan A, Karamanlioglu B, Pamukcu Z, Kurt I: Adding dexmedetomidine to lidocaine for intravenous regional anesthesia. *Anesth Analg* 2004; 98:835-40
- Benoit PW, Belt WD: Destruction and regeneration of skeletal muscle after treatment with a local anaesthetic, bupivacaine (Marcaine). *J Anat* 1970; 107:547-56
- Yagiela JA, Benoit PW, Buoncristiani RD, Peters MP, Fort NF: Comparison of myotoxic effects of lidocaine with epinephrine in rats and humans. *Anesth Analg* 1981; 60:471-80
- Zink W, Graf BM: Local anesthetic myotoxicity. *Reg Anesth Pain Med* 2004; 29:333-40
- Zink W, Seif C, Bohl JR, Hacke N, Braun PM, Sinner B, Martin E, Fink RH, Graf BM: The acute myotoxic effects of bupivacaine and ropivacaine after continuous peripheral nerve blockades. *Anesth Analg* 2003; 97:1173-9
- Hebl JR: Ultrasound-guided regional anesthesia and the prevention of neurologic injury: Fact or fiction? *ANESTHESIOLOGY* 2008; 108:186-8
- Koff MD, Cohen JA, McIntyre JJ, Carr CF, Sites BD: Severe brachial plexopathy after an ultrasound-guided single-injection nerve block for total shoulder arthroplasty in a patient with multiple sclerosis. *ANESTHESIOLOGY* 2008; 108:325-8
- Horlocker TT, O'Driscoll SW, Dinapoli RP: Recurring brachial plexus neuropathy in a diabetic patient after shoulder surgery and continuous interscalene block. *Anesth Analg* 2000; 91:688-90
- Gerner P, Luo SH, Zhuang ZY, Djalali AG, Zizza AM, Myers RR, Wang GK: Differential block of N-propyl derivatives of amitriptyline and doxepin for sciatic nerve block in rats. *Reg Anesth Pain Med* 2005; 30:344-50
- Hung YC, Kau YC, Zizza AM, Edrich T, Zurakowski D, Myers RR, Wang GK, Gerner P: Ephedrine blocks rat sciatic nerve *in vivo* and sodium channels *in vitro*. *ANESTHESIOLOGY* 2005; 103:1246-52
- Kau YC, Hung YC, Zizza AM, Zurakowski D, Greco WR, Wang GK, Gerner P: Efficacy of lidocaine or bupivacaine combined with ephedrine in rat sciatic nerve block. *Reg Anesth Pain Med* 2006; 31:14-8
- Dybre H, Soderberg L, Bjorkman S, Carlsson C: Local anesthetics in lipid-depot formulations: Neurotoxicity in relation to duration of effect in a rat model. *Reg Anesth Pain Med* 2006; 31:401-8
- Soderberg L, Dybre H, Roth B, Bjorkman S: Ultralong peripheral nerve block by lidocaine:prilocaine 1:1 mixture in a lipid depot formulation: Comparison of *in vitro*, *in vivo*, and effect kinetics. *ANESTHESIOLOGY* 2006; 104:110-21
- Kytta J, Heinonen E, Rosenberg PH, Wahlstrom T, Gripenberg J, Huopaniemi T: Effects of repeated bupivacaine administration on sciatic nerve and surrounding muscle tissue in rats. *Acta Anaesthesiol Scand* 1986; 30:625-9
- Pere P, Watanabe H, Pitkanen M, Wahlstrom T, Rosenberg PH: Local myotoxicity of bupivacaine in rabbits after continuous supraclavicular brachial plexus block. *Reg Anesth* 1993; 18:304-7
- Gaumann DM, Brunet PC, Jirounek P: Clonidine enhances the effects of lidocaine on C-fiber action potential. *Anesth Analg* 1992; 74:719-25
- Sia S, Lepri A: Clonidine administered as an axillary block does not affect postoperative pain when given as the sole analgesic. *Anesth Analg* 1999; 88:1109-12
- Iskandar H, Benard A, Ruel-Raymond J, Cochard G, Manaud B: The analgesic effect of interscalene block using clonidine as an analgesic for shoulder arthroscopy. *Anesth Analg* 2003; 96:260-2
- Kroin JS, Buvanendran A, Beck DR, Topic JE, Watts DE, Tuman KJ: Clonidine prolongation of lidocaine analgesia after sciatic nerve block in rats is mediated *via* the hyperpolarization-activated cation current, not by  $\alpha$ -adrenoreceptors. *ANESTHESIOLOGY* 2004; 101:488-94
- Leem JW, Choi Y, Han SM, Yoon MJ, Sim JY, Leem SW: Conduction block by clonidine is not mediated by  $\alpha_2$ -adrenergic receptors in rat sciatic nerve fibers. *Reg Anesth Pain Med* 2000; 25:620-5
- Lavand'homme PM, Eisenach JC: Perioperative administration of the  $\alpha_2$ -adrenoceptor agonist clonidine at the site of nerve injury reduces the development of mechanical hypersensitivity and modulates local cytokine expression. *Pain* 2003; 105:247-54
- Lavand'homme PM, Ma W, De Kock M, Eisenach JC: Perineural  $\alpha_2\text{-}\alpha$  adrenoceptor activation inhibits spinal cord neuroplasticity and tactile allodynia after nerve injury. *ANESTHESIOLOGY* 2002; 97:972-80

42. Liu B, Eisenach JC: Perineural clonidine reduces p38 mitogen-activated protein kinase activation in sensory neurons. *Neuroreport* 2006; 17:1313-7
43. Romero-Sandoval A, Eisenach JC: Perineural clonidine reduces mechanical hypersensitivity and cytokine production in established nerve injury. *ANESTHESIOLOGY* 2006; 104:351-5
44. Romero-Sandoval A, Eisenach JC: Clonidine reduces hypersensitivity and alters the balance of pro- and anti-inflammatory leukocytes after local injection at the site of inflammatory neuritis. *Brain Behav Immun* 2007; 21:569-80
45. Romero-Sandoval EA, McCall C, Eisenach JC: Alpha2-adrenoceptor stimulation transforms immune responses in neuritis and blocks neuritis-induced pain. *J Neurosci* 2005; 25:8988-94
46. Starke K, Wagner J, Schumann HJ: Adrenergic neuron blockade by clonidine: Comparison with guanethidine and local anesthetics. *Arch Int Pharmacodyn Ther* 1972; 195:291-308
47. Butterworth JFV, Strichartz GR: The alpha 2-adrenergic agonists clonidine and guanfacine produce tonic and phasic block of conduction in rat sciatic nerve fibers. *Anesth Analg* 1993; 76:295-301
48. Gaumann DM, Brunet PC, Jirounek P: Hyperpolarizing afterpotentials in C fibers and local anesthetic effects of clonidine and lidocaine. *Pharmacology* 1994; 48:21-9
49. Dalle C, Schneider M, Clergue F, Bretton C, Jirounek P: Inhibition of the I(h) current in isolated peripheral nerve: A novel mode of peripheral antinociception? *Muscle Nerve* 2001; 24:254-61
50. Pape HC: Queer current and pacemaker: The hyperpolarization-activated cation current in neurons. *Annu Rev Physiol* 1996; 58:299-327
51. Shirasaka T, Kannan H, Takasaki M: Activation of a G protein-coupled inwardly rectifying K<sup>+</sup> current and suppression of I<sub>h</sub> contribute to dexmedetomidine-induced inhibition of rat hypothalamic paraventricular nucleus neurons. *ANESTHESIOLOGY* 2007; 107:605-15
52. Oda A, Iida H, Tanahashi S, Osawa Y, Yamaguchi S, Dohi S: Effects of  $\alpha$ 2-adrenoceptor agonists on tetrodotoxin-resistant Na<sup>+</sup> channels in rat dorsal root ganglion neurons. *Eur J Anaesthesiol* 2007; 24:934-41
53. Gordh T Jr, Post C, Olsson Y: Evaluation of the toxicity of subarachnoid clonidine, guanfacine, and a substance P-antagonist on rat spinal cord and nerve roots: Light and electron microscopic observations after chronic intrathecal administration. *Anesth Analg* 1986; 65:1303-11
54. Gordh TE, Ekman S, Lagerstedt AS: Evaluation of possible spinal neurotoxicity of clonidine. *Ups J Med Sci* 1984; 89:266-73
55. Konakci S, Adanir T, Yilmaz G, Rezano T: The efficacy and neurotoxicity of dexmedetomidine administered *via* the epidural route. *Eur J Anaesthesiol* 2008; 25:403-9
56. Ilfeld BM, Enneking FK: Continuous peripheral nerve blocks at home: A review. *Anesth Analg* 2005; 100:1822-33
57. Ilfeld BM, Le LT, Meyer RS, Mariano ER, Vandenberg K, Duncan PW, Sessler DI, Enneking FK, Shuster JJ, Theriaque DW, Berry LF, Spadoni EH, Gearen PF: Ambulatory continuous femoral nerve blocks decrease time to discharge readiness after tricompartment total knee arthroplasty: A randomized, triple-masked, placebo-controlled study. *ANESTHESIOLOGY* 2008; 108:703-13
58. Ilfeld BM, Morey TE, Wright TW, Chidgey LK, Enneking FK: Continuous interscalene brachial plexus block for postoperative pain control at home: A randomized, double-blinded, placebo-controlled study. *Anesth Analg* 2003; 96:1089-95
